# Supplementary material for: Magnetic immobilization of amine-functionalized magnetite microspheres in a knotted reactor for on-line solid-phase extraction coupled with ICP-MS for speciation analysis of trace chromium
Source: Royal Society of Chemistry journal article supplement (doi:10.1039/c004272b), 2010-01-01
Supplement: c004272b.pdf [file c004272b.pdf]

## Electronic Supplementary Information

### Magnetic Immobilization of Amine-Functionalized Magnetite Microspheres in a Knotted Reactor for On-Line Solid-Phase Extraction Coupled with ICP-MS for Speciation of Trace Chromium

Yan-Feng Huang,<sup>†</sup> Yan Li, Yan Jiang and Xiu-Ping Yan\*

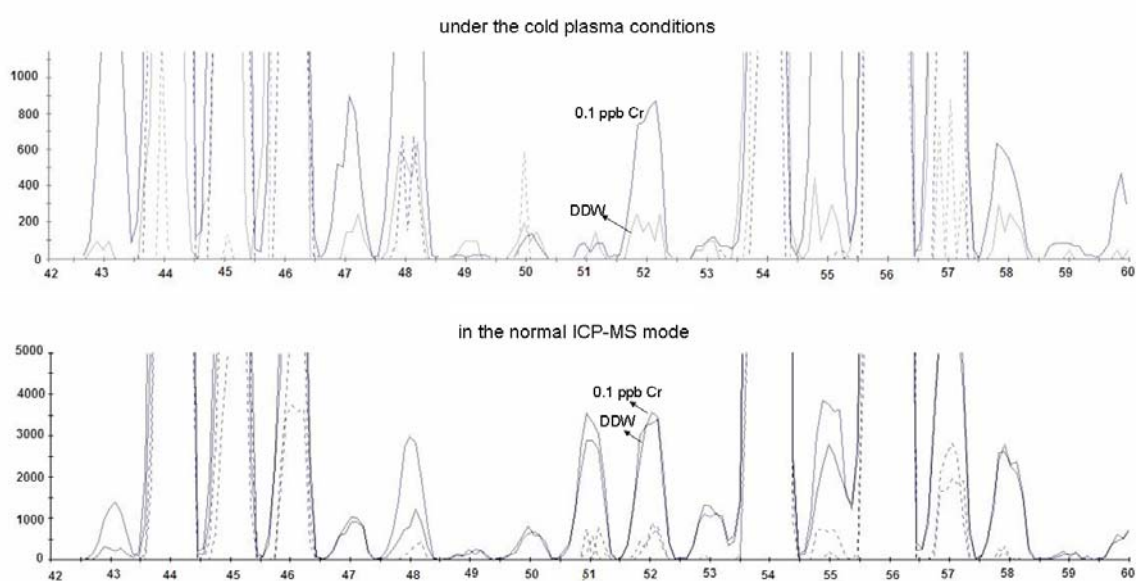

Figure S1. Mass spectra of the background and the standard of Cr (0.1 ppb Cr<sup>III</sup>) under the cold plasma conditions and normal plasma conditions using conventional direct sample introduction system.

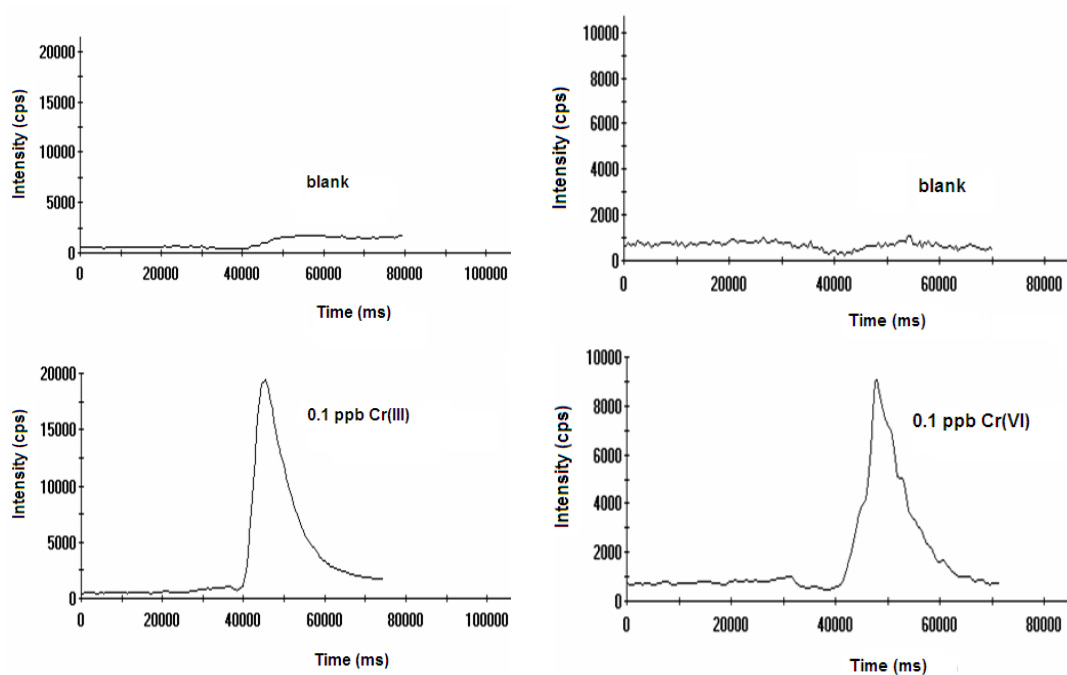

Figure S2. ICP-MS signals of the blank and the standard of Cr (0.1 ppb Cr) under the cold plasma conditions when running in the FI mode.
